# Supplementary material
Source: Springer Nature journal article supplement (https://www.springermedizin.de/resource/supplementary/12889_2010_3559_MOESM2_ESM.pdf/9489340)
Supplement: MOESM2 [file 9489340]

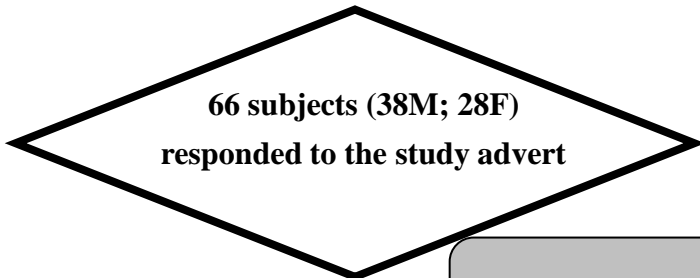

**66 subjects (38M; 28F)  
responded to the study advert**

14 subjects (9M; 5F) ineligible due to their request to be assisted with quitting

**52 subjects (29 M; 23 F)  
consented to participate**

12 subjects (3M; 9F) ineligible due to exclusion criteria (6 hypertension; 2 age > 60 yrs; 2 Hx of major depression; 1 Hx of recent myocardial infarction; 1 Hx of asthma)

**40 subjects (26 M; 14F) eligible for inclusion in the study  
and assigned to use the e-Cigarette**

Baseline Visit 1

6 subjects (4M; 2F):  
lost to follow up

**34 subjects (23M;11F) eligible for week-4 analyses**

Visit 2

2 subjects (1M; 1F):  
lost to follow up

**32 subjects (22M;10F) eligible for week-8 analyses**

Visit 3

2 subjects (1M; 1F):  
lost to follow up

**30 subjects (21M;9F) eligible for week-12 analyses**

Visit 4

3 subjects (3M):  
lost to follow up

**27 subjects (18M;9F) eligible for week-24 analyses**

Final Visit 5
